# Supplementary material for: AURKB as a target in non-small cell lung cancer with acquired resistance to anti-EGFR therapy
Source: PubMed Central journal article supplement (PMC6472415; doi:10.1038/s41467-019-09734-5), 2019-04-18
Supplement: 41467_2019_9734_MOESM1_ESM.pdf [file 41467_2019_9734_MOESM1_ESM.pdf]

**AURKB as a target in non-small cell lung cancer with acquired  
resistance to anti-EGFR therapy**

Bertran-Alamillo et al.

**SUPPLEMENTARY FIGURES**

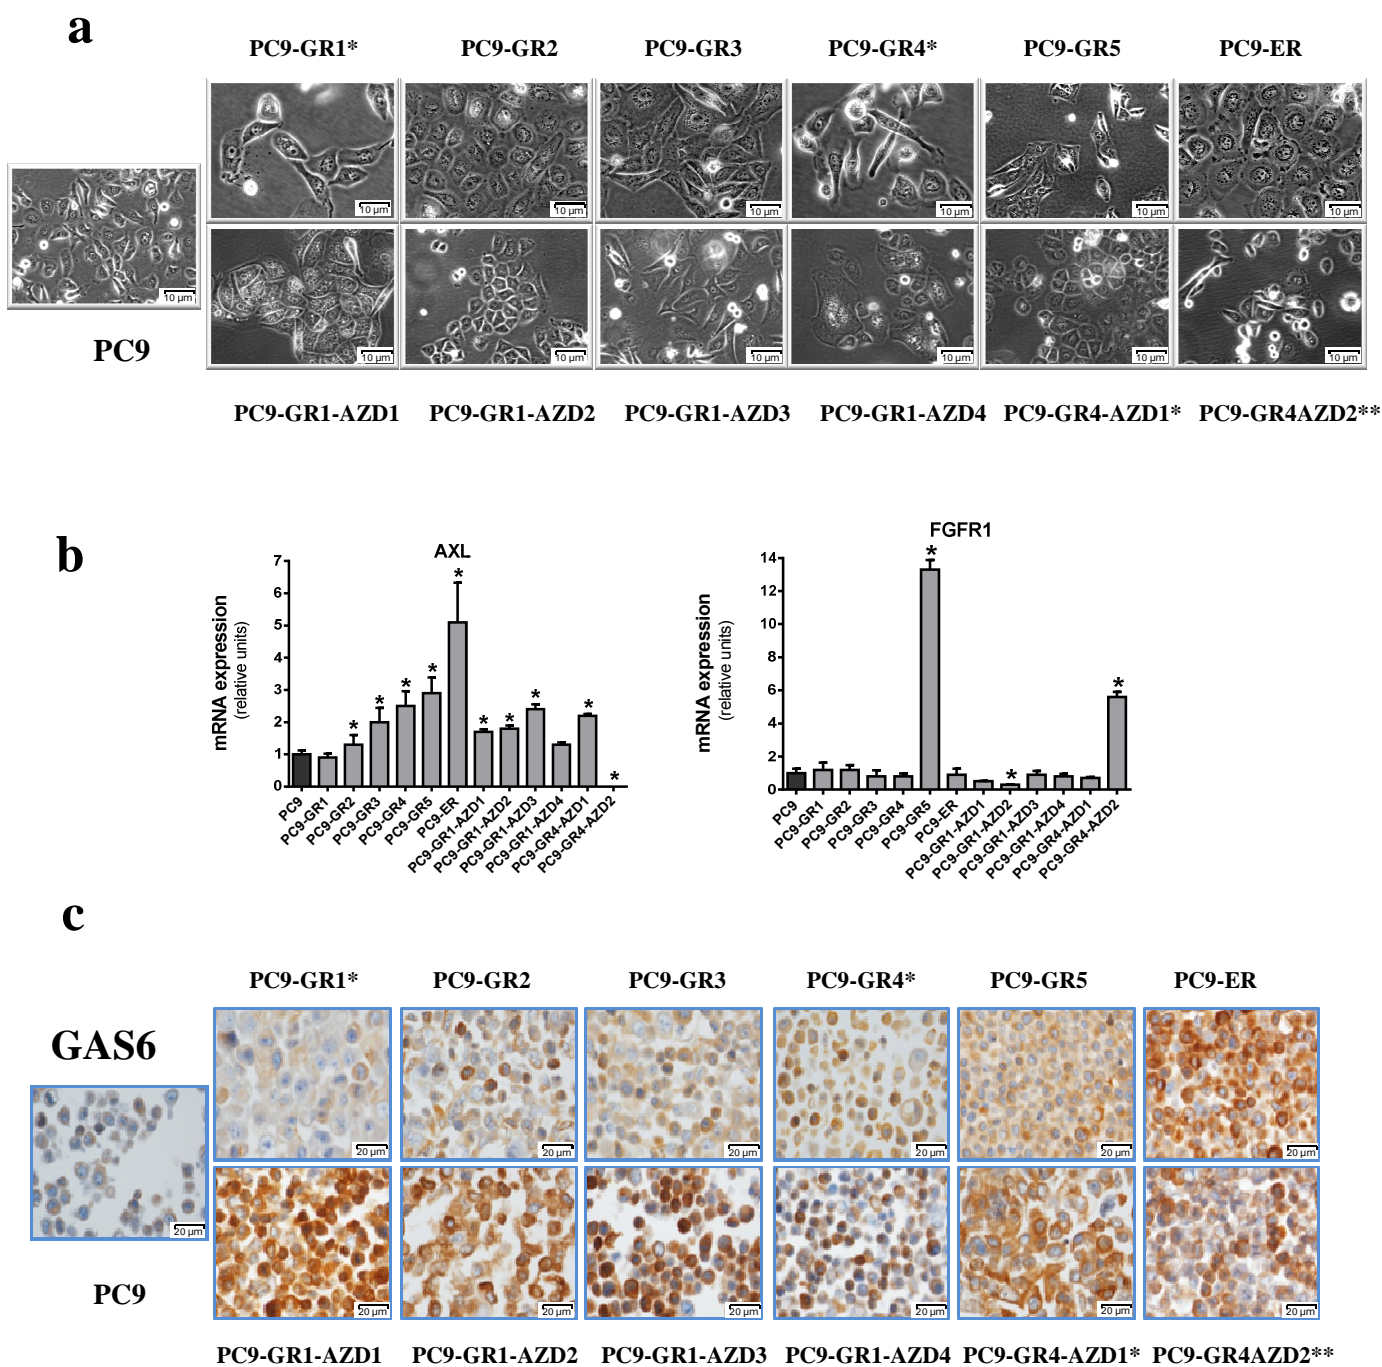

**Supplementary Fig. 1:** Characterization of the EGFR TKI resistant cell lines used in this study. **a** Microscopic photographs of the parental and resistant PC9 cells. Asterisks indicated cell lines harboring the T790M resistant mutation at  $>0.1\%$  (\*) or  $<0.1\%$  (\*\*) allelic fraction. Scale bars indicate  $10\ \mu\text{m}$ . **b** Relative expression levels of the *AXL* and *FGFR* mRNAs. No significant differences were found on the case of *MER* and *MET*. Experiments were conducted in triplicates, values shown are means  $\pm$  S.D. and asterisks indicate statistical significance ( $P < 0.05$  in a Student's t test). **c** IHC staining of GAS6, showing the cytoplasmic localization of the protein in all cell lines of the panel. Images were obtained with an x40 objective. Scale bars indicate  $20\ \mu\text{m}$ .

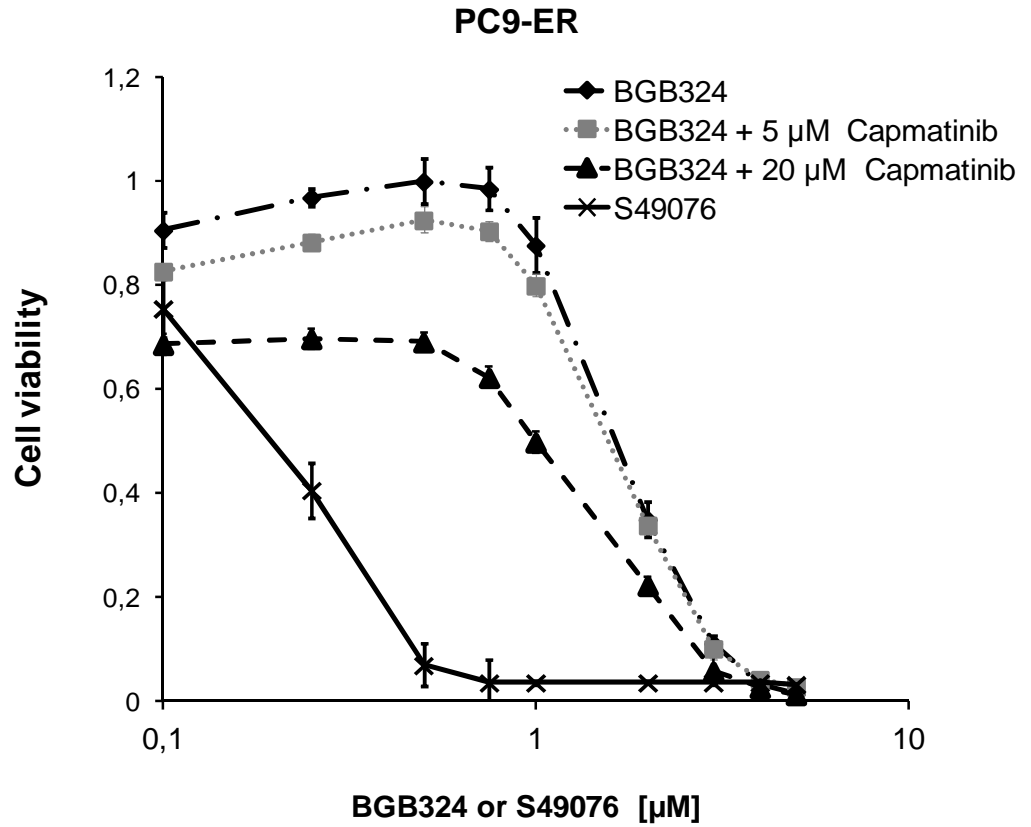

**Supplementary Fig. 2:** Dose-response plots of PC9-ER cells treated with BGB324, BGB324 in combination with capmatinib and S49076. Experiments were conducted in triplicates, values shown are means  $\pm$  S.D.

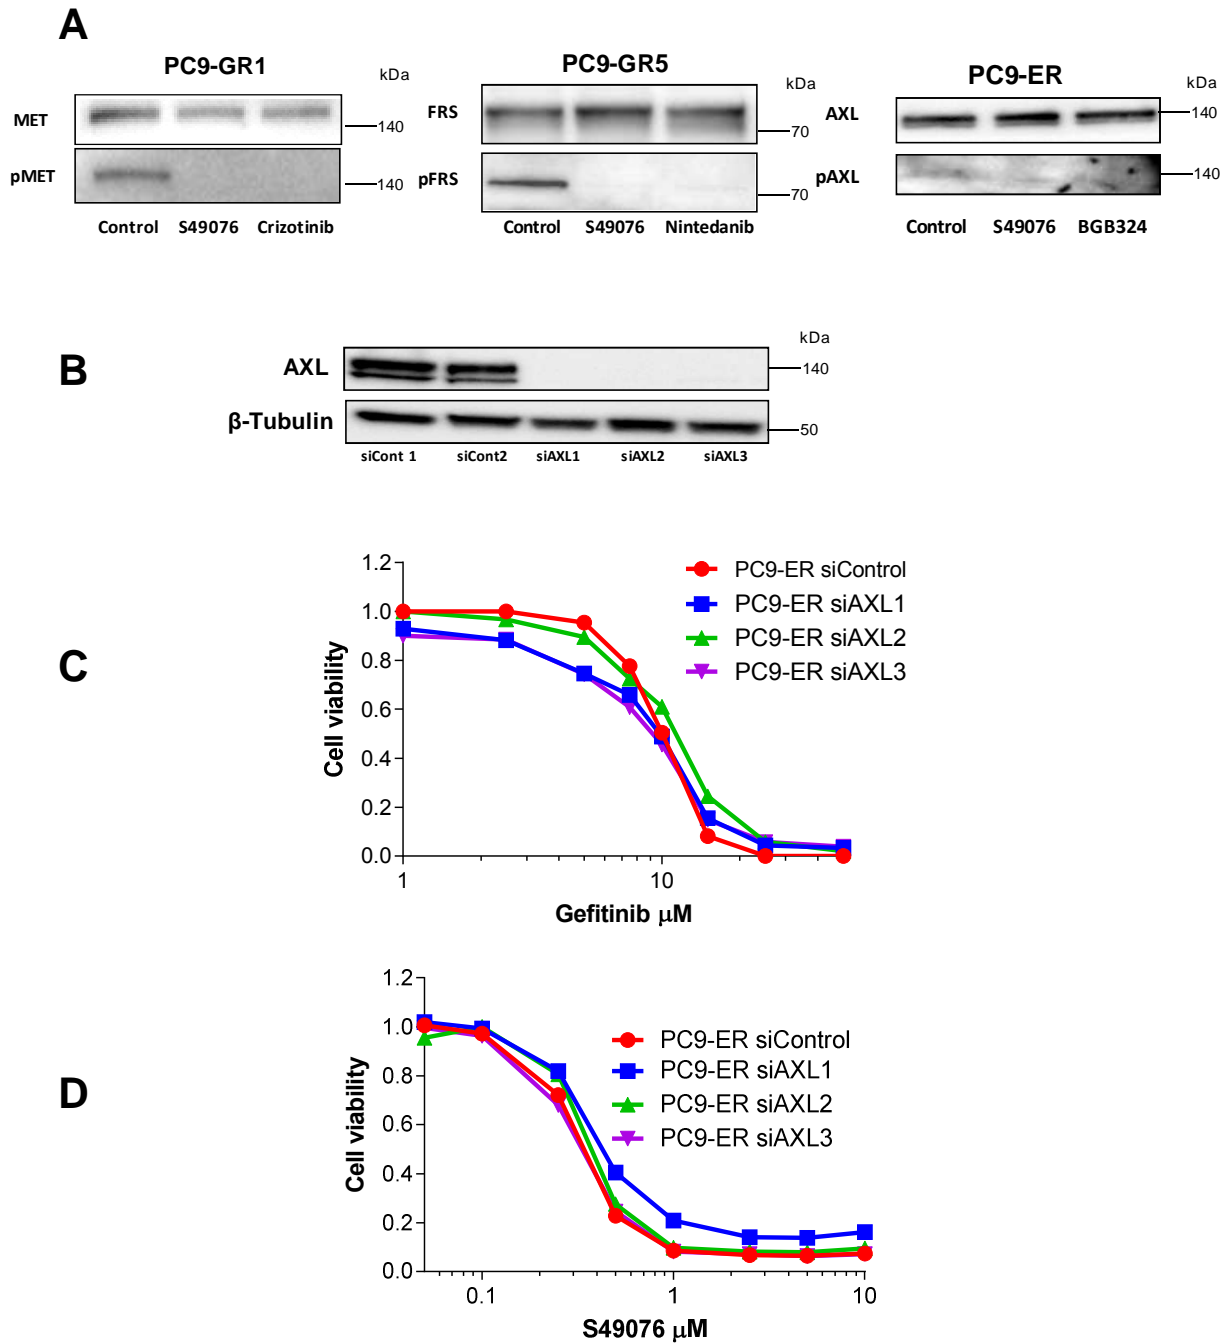

**Supplementary Fig. 3: a** Effects of S49076, crizotinib and nintedanib and BGB324 on the phosphorylation of MET, FRS and AXL. **b** Expression of AXL by Western blotting in the control and the silenced clones. **c, d** Dose-response plots to gefitinib and S49076 of the PC9-ER control clones and the clones with stable AXL silencing. Experiments were conducted in triplicates, values shown are means

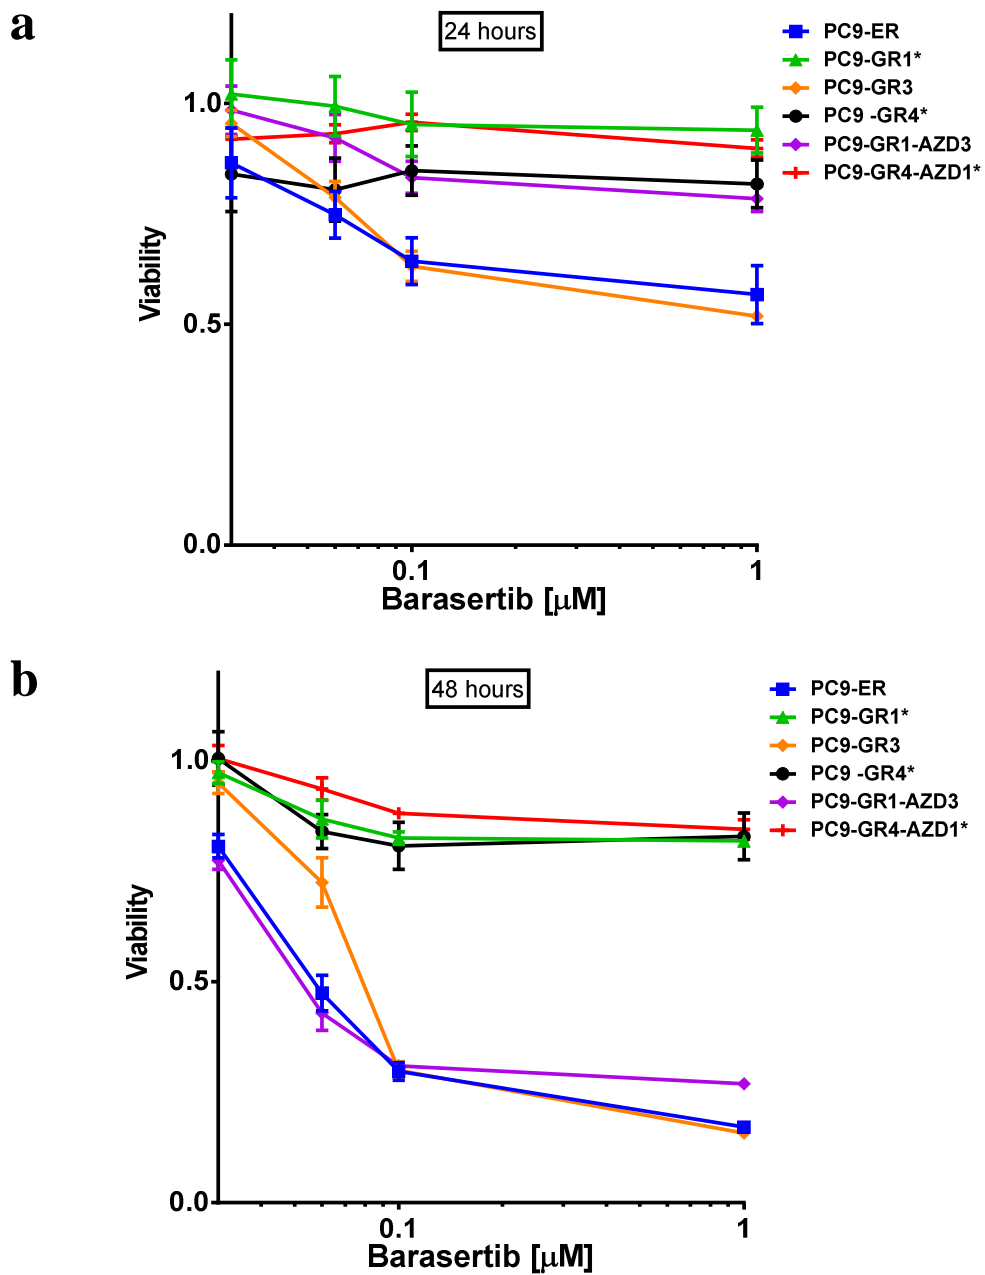

**Supplementary Fig. 4:** Dose-response curves of selected parental and EGFR TKI resistant cells to the AURKB inhibitor barasertib at 24 (a) and 48 h (b). Asterisks indicated cell lines harboring the T790M resistant mutation. Experiments were conducted in triplicates, values shown are means  $\pm$  S.D.

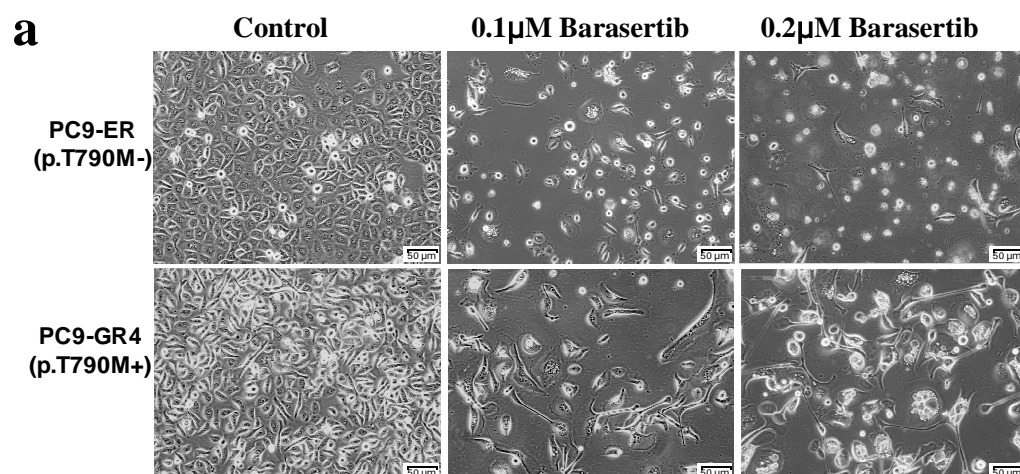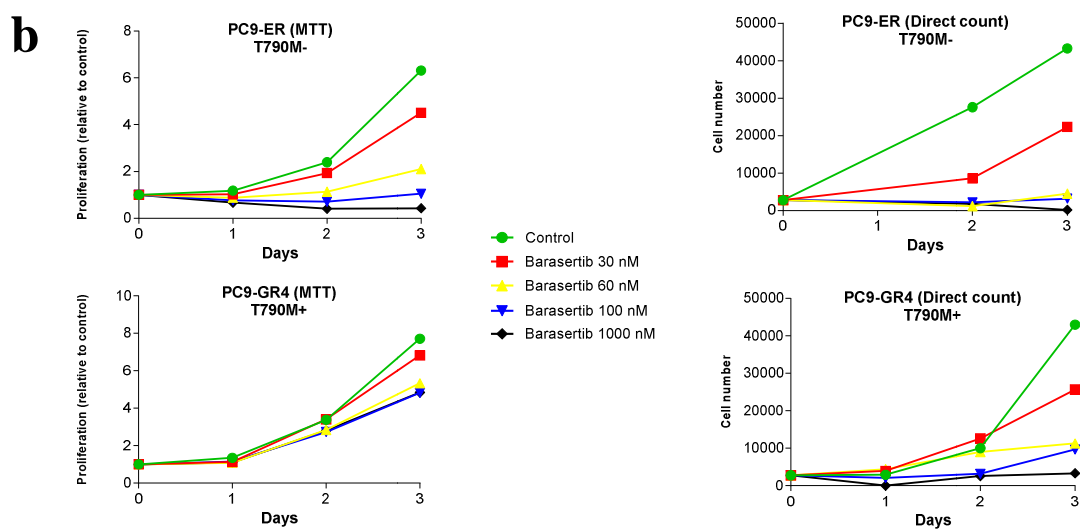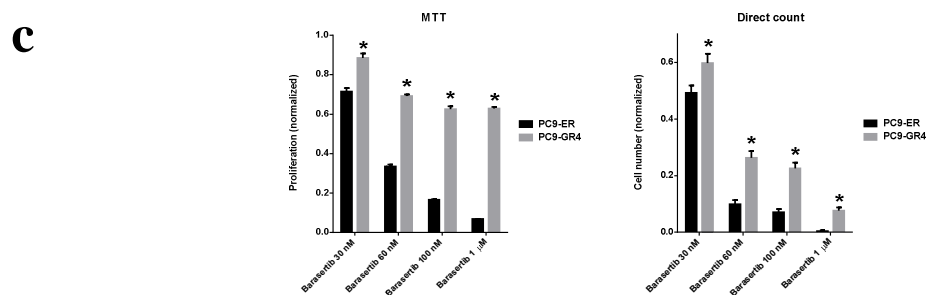

**Supplementary Fig. 5:** Effects of Barasertib on PC9-ER (p.T790M-negative) and PC9-GR4 (p.T790M-positive) cell lines. **a** Microscopic photographs of the cells at different concentrations of the inhibitor. Scale bars indicate 50  $\mu$ m. **b** Growth curves of the cell lines in presence of the inhibitors, determined by MTT (left) or direct counting (right). **c** Comparison of the final numbers of cells of the growth curves presented in (b), as estimated by MTT (left) or direct count (right). Experiments were conducted in triplicates, values shown are means  $\pm$  S.D. and asterisks indicate statistical significance ( $P < 0.05$  in a Student's t test)

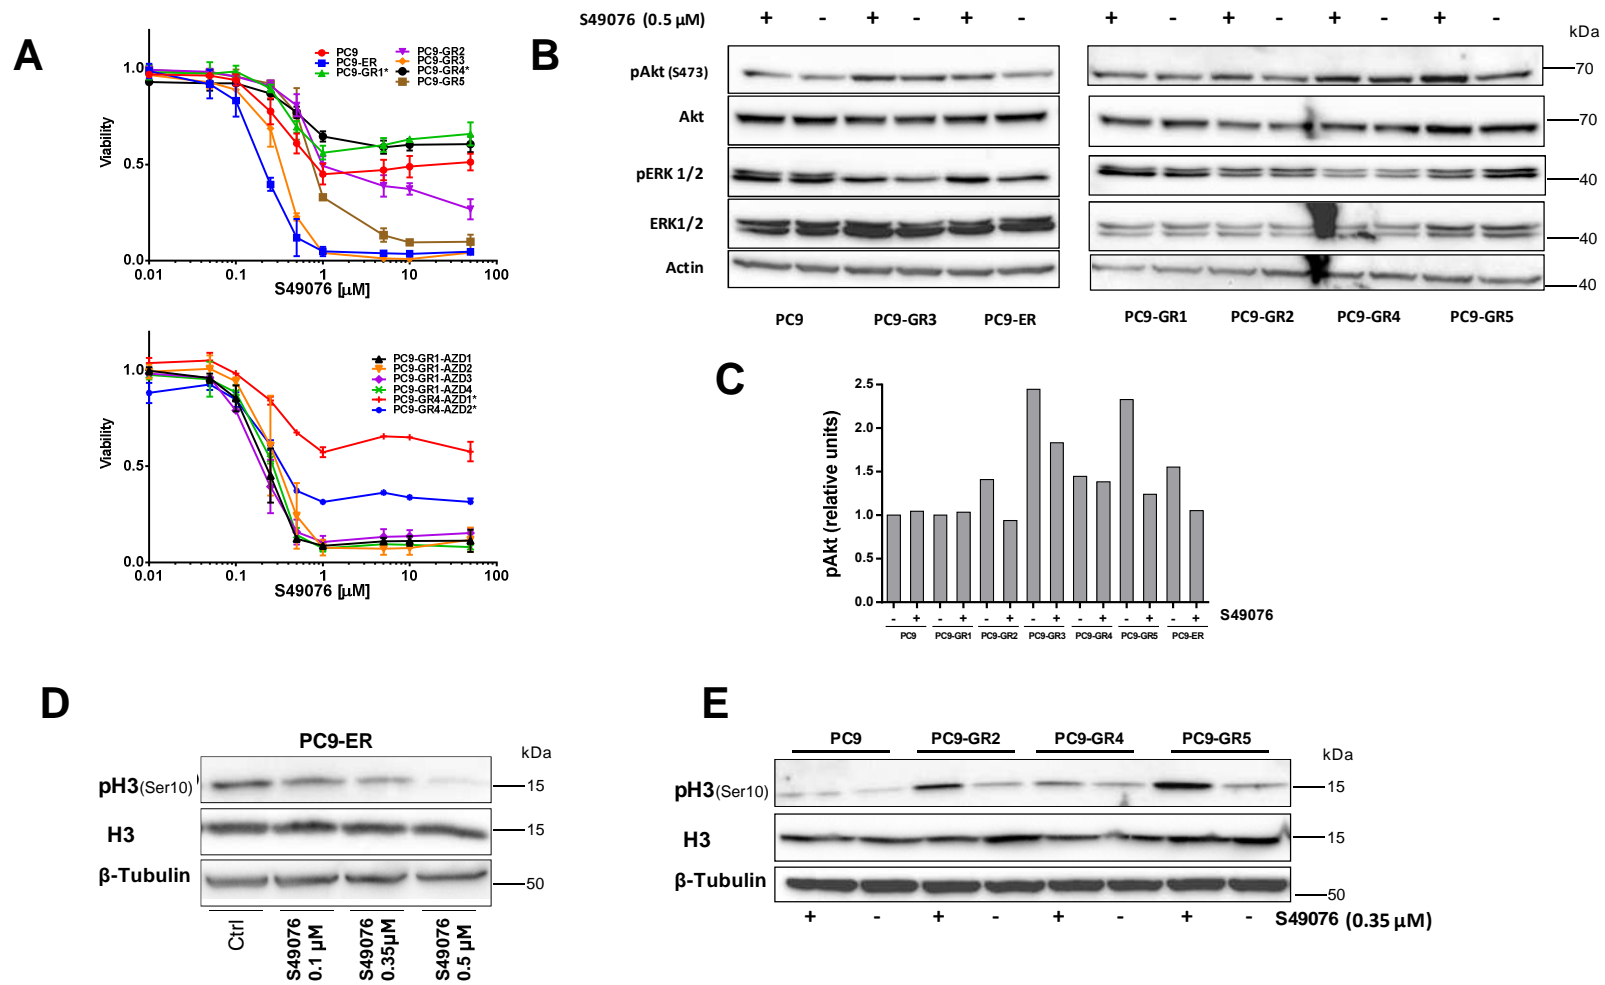

**Supplementary Fig. 6:** Effects of the MET/AXL/FGFR/AURKB inhibitor S49076 on EGFR TKI resistant cell lines. **a** Dose-response curves of the parental and the EGFR TKI resistant cells to S49076. Experiments were conducted in tri or quadruplicates and values shown are means  $\pm$  S.D. **b** Effects of the S49076 on the phosphorylation of Erk1/2 and Akt. Incubation time was 2 h. **c** Quantification of the Western blot for pAkt. **d** Western blot showing the dose-dependent decrease of pH3 levels induced by S49076 at 24 h. **e** Western blot demonstrating the inhibition of pH3 by S49076 after 24 h in EGFR-mut cell lines



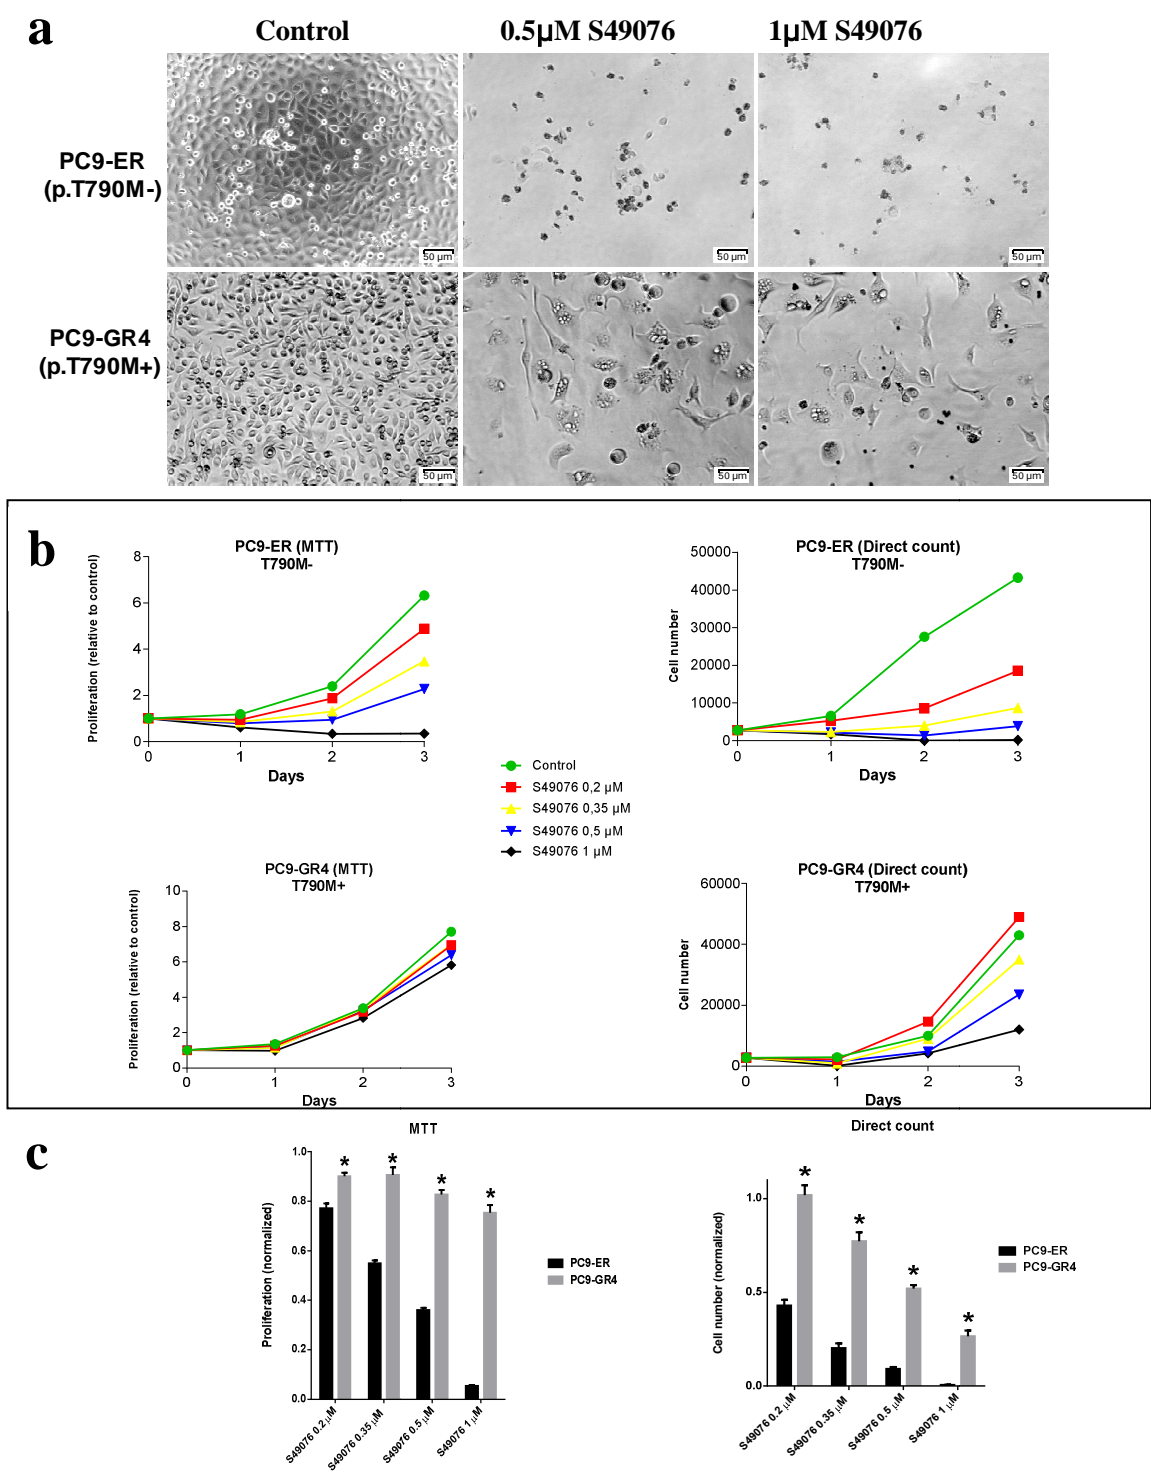

**Supplementary Fig. 7:** Effects of S49076 on PC9-ER (p.T790M-negative) and PC9-GR4 (p.T790M-positive) cell lines. **a** Microscopic photographs of the cells at different concentrations of the inhibitor. Scale bars indicate 50 $\mu$ m **b** Growth curves of the cell lines in presence of the inhibitors, determined by MTT (left) or direct counting (right). **c** Comparison of the final numbers of cells of the growth curves presented in **(b)**, as estimated by MTT (left) or direct count (right). Values shown are means  $\pm$  S.D. of six replicates and asterisks indicate statistical significance ( $P < 0.05$  in a Student's t test)

**a**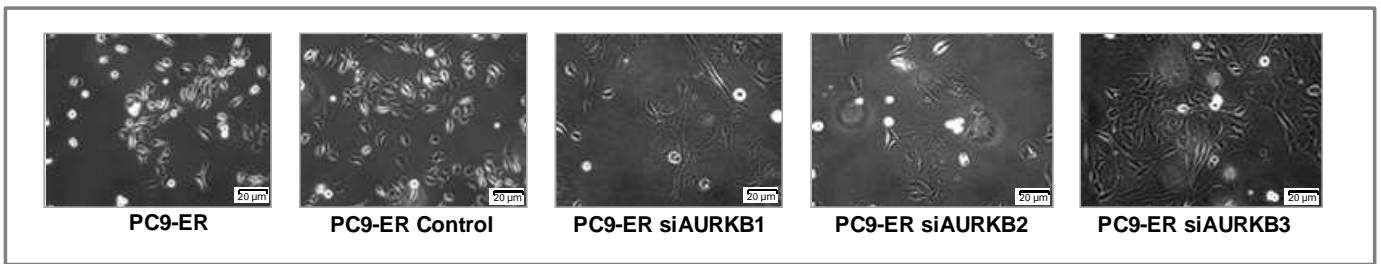**b**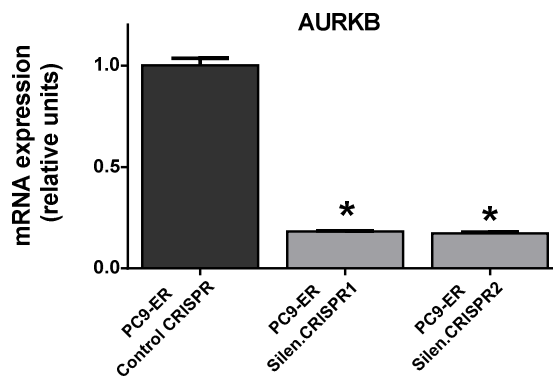**c**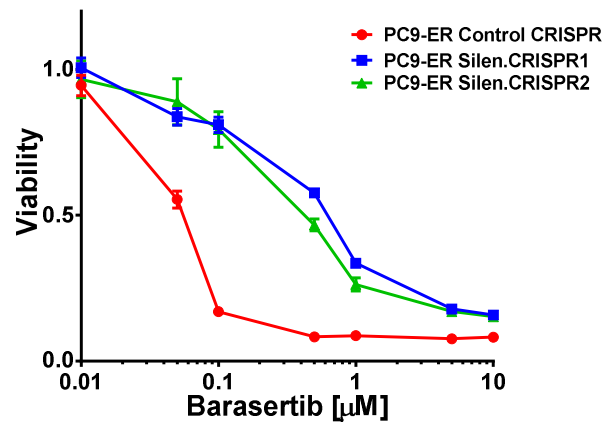

**Supplementary Fig. 8:** **a** Microscopic photographs of the parental PC9-ER cells, the clones partly silenced for *AURKB* (siAURKB1-3) and the clone transfected with a control plasmid. Scale bars indicate 20 μm **b** Relative expression levels of the *AURKB* mRNAs in the PC9-ER control clone and the clones with *AURKB* CRISPR silencing. Values shown are means ± S.D. of three replicates and asterisks indicate statistical significance ( $P < 0.05$  in a Student's *t* test). **c** Dose-response plots to barasertib of the PC9-ER control clone and the clones with *AURKB* CRISPR silencing. Values shown are means ± S.D. of six replicates

**a****PC9-ER**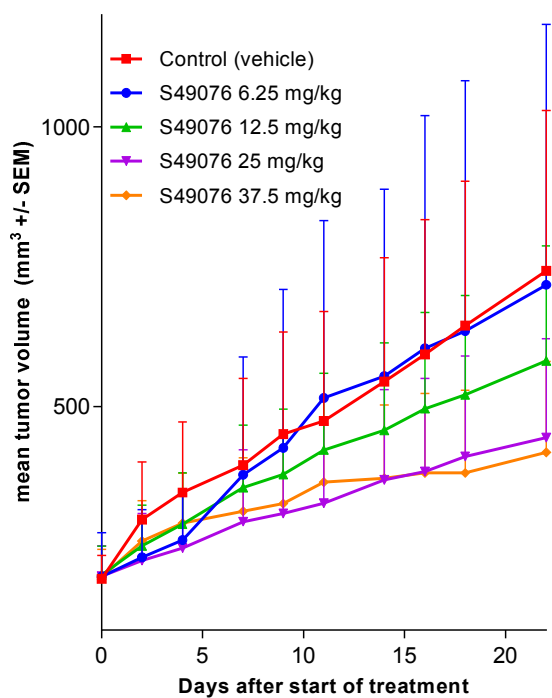**PC9-GR4**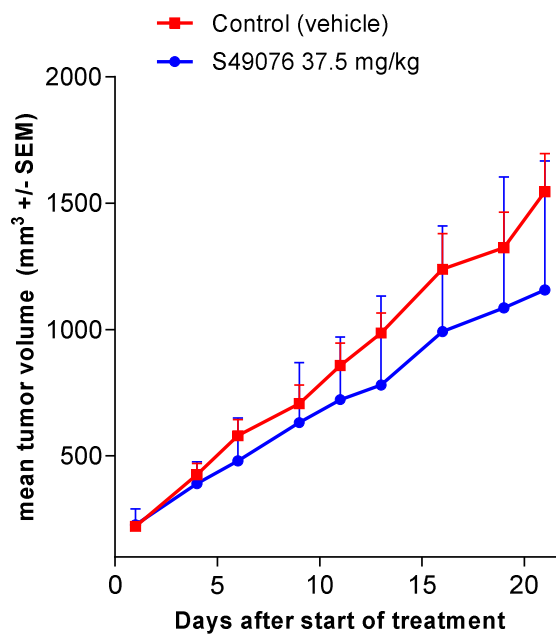**b**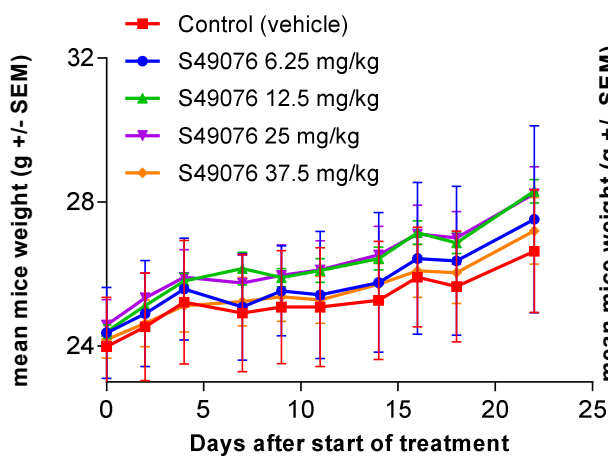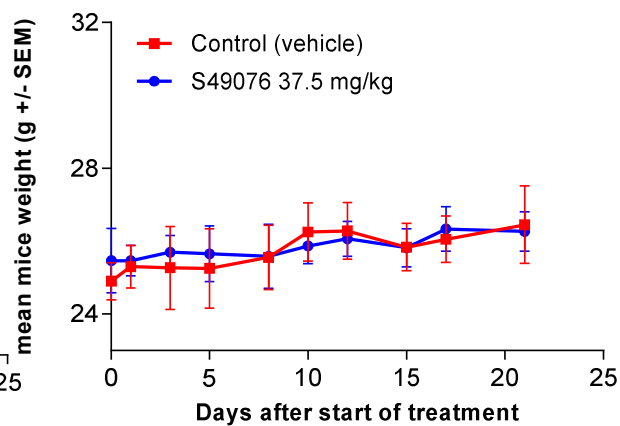

**Supplementary Fig. 9:** Effects of S49076 on the growth of subcutaneous PC9-ER (left panels) and PC9-GR4 xenografts (right panels). **a** Time course assessment of total tumor volume. **b** Weight of the animals used in the study. Values shown are means  $\pm$  S.E.M of six replicates

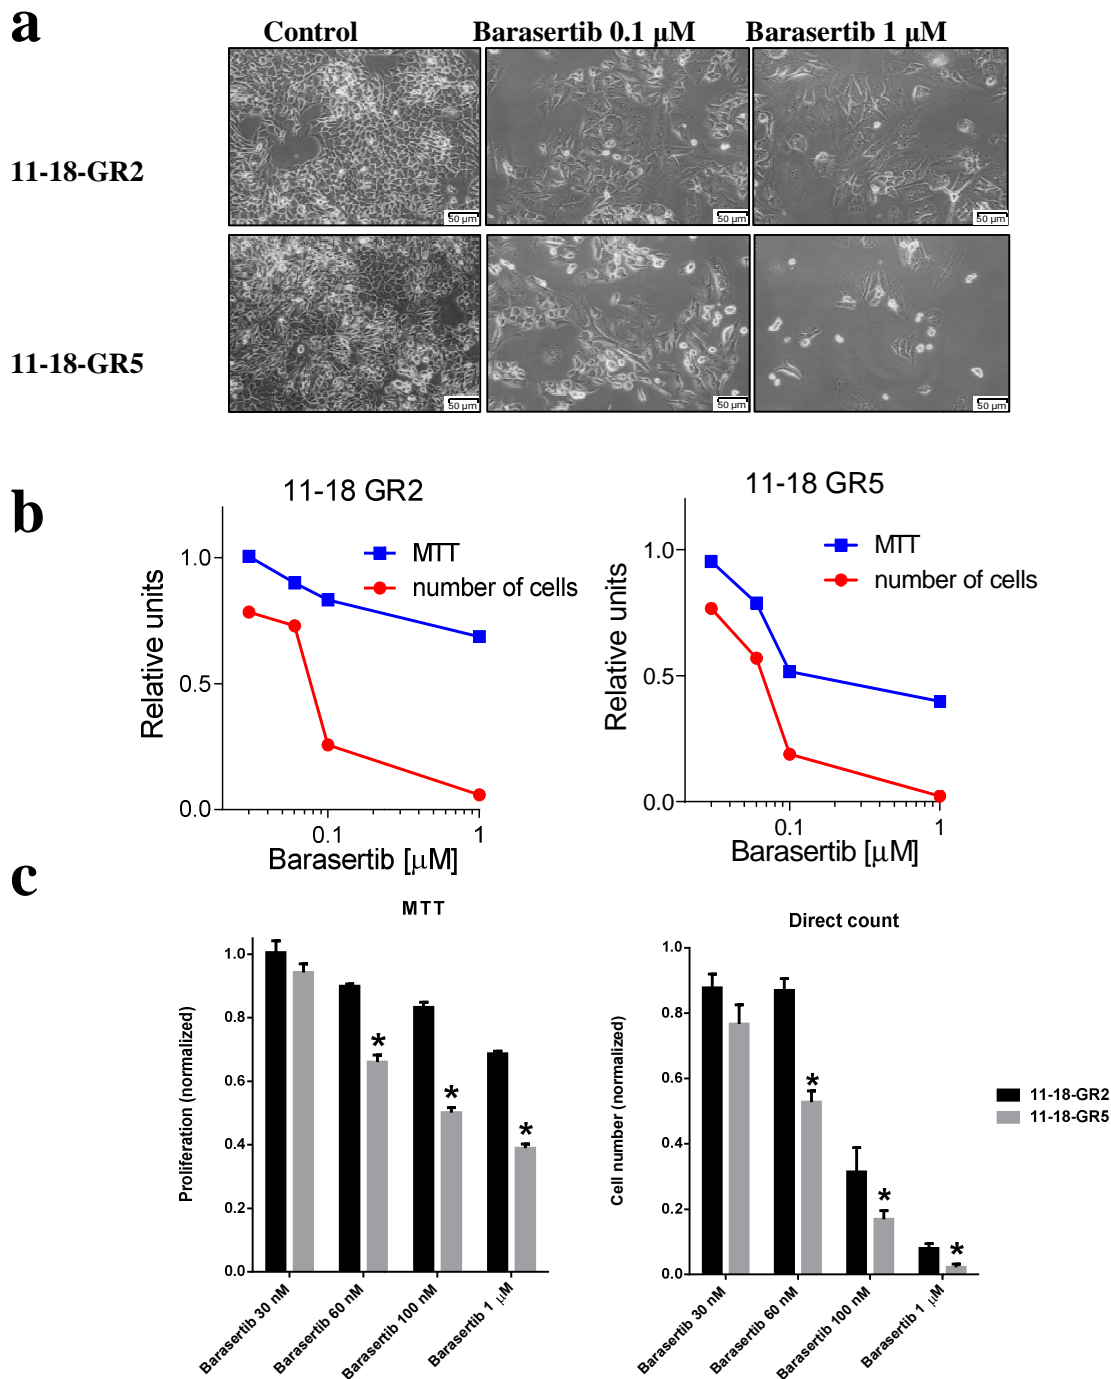

**Supplementary Fig. 10:** Effects of Barasertib on 11-18-GR5 (*NRAS* and T790M-negative) and 11-18-GR2 (*NRAS* Q61L) cell lines. **a** Microscopic photographs of the cells at different concentrations of the inhibitor. Scale bars indicate 50  $\mu\text{m}$ . **b** Comparison of the dose-response to barasertib, as determined by MTT or direct counting in 11-18 GR2 (left) or 11-18 GR5 (right). **c** Comparison of the dose-response to barasertib of 11-18 GR2 and GR5, as determined by MTT (left) or direct counting (right). Values shown are means  $\pm$  S.D. of six replicates and asterisks indicate statistical significance ( $P < 0.05$  in a Student's *t* test).

**a**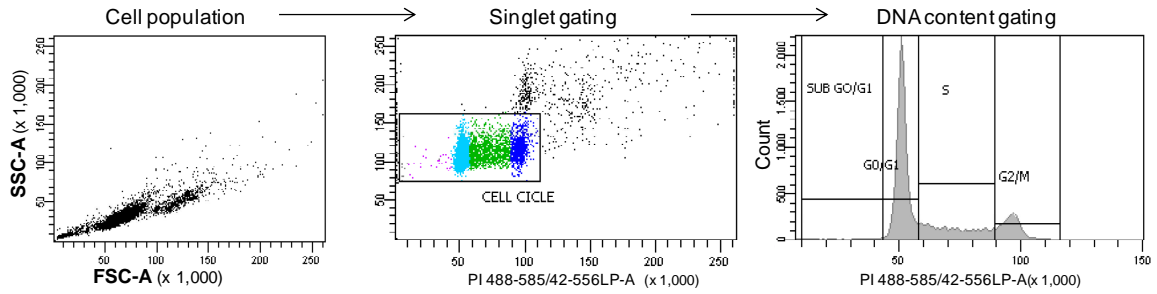**b**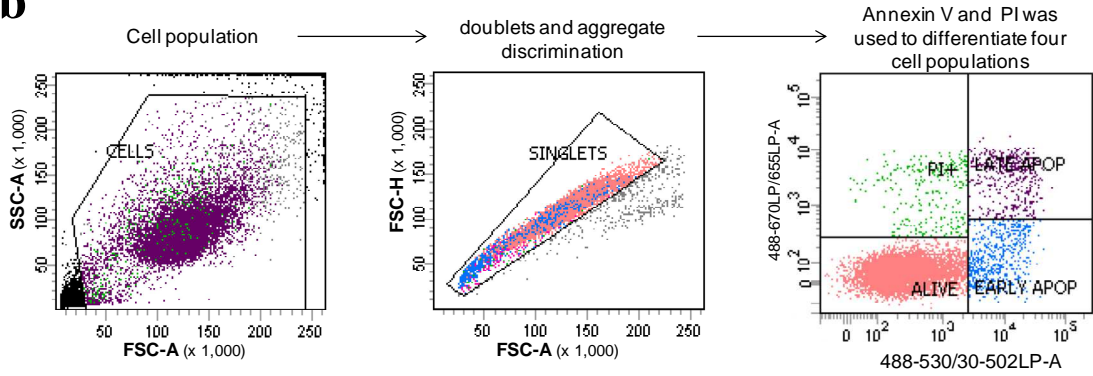**c**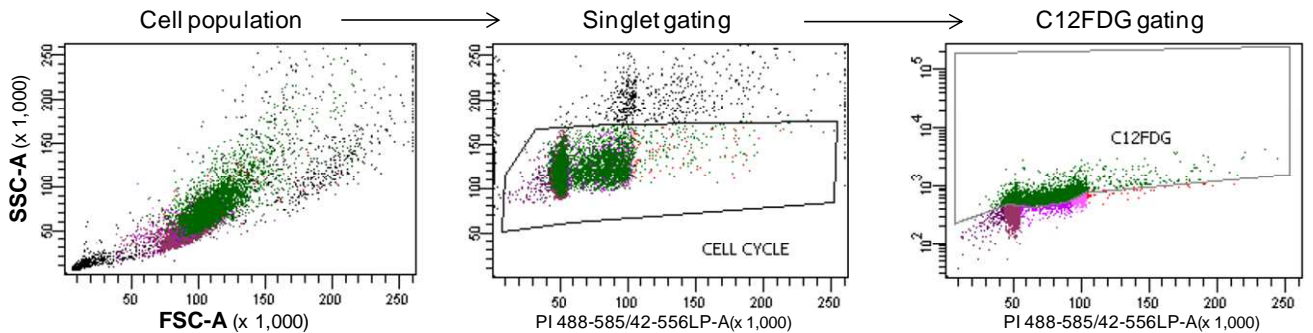

**Supplementary Fig. 11:** Representative FACS plots showing the gating strategy for flow cytometry analysis of: **a** cell-cycle profile (Propidium Iodide staining), **b** cell death (Annexin-V and Propidium Iodide staining), **c** senescent cells (C12FDG).

**SUPPLEMENTARY TABLES**

**Supplementary Table 1:** Doubling times and IC50 of selected inhibitors in the *AURKB* and *AXL* silenced clones derived from PC9-ER and used in this study. Values shown are the means of at least three different experiments. ND, not determined.

| Cell line/Clone | Doubling time (h) | S49076 | Barasertib | Tozasertib | BGB324 | Foretinib | Crizotinib | Gefitinib |
|-----------------|-------------------|--------|------------|------------|--------|-----------|------------|-----------|
| PC9-ER          | 27±2              | 0.3    | 0.06       | 0.2        | 2.3    | 0.7       | 1.4        | 12.2      |
| PC9-ER siCont 1 | 27±4              | 0.3    | 0.04       | 0.2        | 2.1    | 0.6       | 1.6        | 10.4      |
| PC9-ER siCont 2 | 31±3              | 0.4    | 0.05       | 0.2        | 2.3    | 0.6       | 1.8        | 8.8       |
| PC9-ER siAXL1   | 31±7              | 0.5    | 0.05       | ND         | 1.5    | ND        | 1.7        | 10.6      |
| PC9-ER siAXL2   | 31±2              | 0.4    | 0.05       | ND         | 1.2    | ND        | 1.6        | 10.3      |
| PC9-ER siAXL3   | ND                | 0.5    | 0.06       | ND         | 1.0    | ND        | 1.4        | 8.9       |
| PC9-ER siAURKB1 | 28±3              | >50    | 16.0       | 3.2        | 1.7    | 1.6       | 4.8        | 14.3      |
| PC9-ER siAURKB2 | 30±4              | >50    | 22.6       | 10.1       | 2.7    | 1.1       | 3.5        | 16.5      |
| PC9-ER siAURKB3 | 28±4              | >50    | 17.2       | 3.7        | 1.7    | 1.2       | 4.5        | 14.2      |

**Supplementary Table 2:** Characteristics of the 59 patients with *EGFR* mutant NSCLC treated with first line *EGFR* TKIs (pre-treatment samples) included in the study.

| <b>Gender</b>                       | <b>no. (%)</b> |
|-------------------------------------|----------------|
| Male                                | 15 (25.4)      |
| Female                              | 44 (74.6)      |
| <b>Age - years</b>                  |                |
| Median                              | 66             |
| Range                               | 36–90          |
| <b>ECOG performance status</b>      |                |
| 0                                   | 15 (25.4)      |
| 1                                   | 26 (44.1)      |
| 2                                   | 15 (25.4)      |
| 3                                   | 3 (5.1)        |
| <b>Smoking status</b>               |                |
| Never                               | 41 (69.5)      |
| Former                              | 14 (23.7)      |
| Current                             | 4 (6.8)        |
| <b>Disease stage</b>                |                |
| IIIB                                | 14 (23.7)      |
| IV                                  | 45 (76.3)      |
| <b>Brain metastasis</b>             |                |
| No                                  | 40 (67.8)      |
| Yes                                 | 19 (32.2)      |
| <b>Bone metastasis</b>              |                |
| No                                  | 33 (55.9)      |
| Yes                                 | 26 (44.1)      |
| <b>Other metastatic sites</b>       |                |
| No                                  | 23 (39.0)      |
| Yes                                 | 36 (61.0)      |
| <b>Type of <i>EGFR</i> mutation</b> |                |
| Exon 19 deletion                    | 36 (61.0)      |
| L858R                               | 19 (32.2)      |
| Other                               | 4 (6.8)        |
| <b>Type of <i>EGFR</i> TKI</b>      |                |
| Erlotinib                           | 44 (58.7)      |
| Gefitinib                           | 29 (38.7)      |
| Afatinib                            | 2 (2.6)        |
| <b>Response*</b>                    |                |
| PD                                  | 6 (10.1)       |
| SD                                  | 19 (32.2)      |
| PR                                  | 32 (54.2)      |
| CR                                  | 2 (3.4)        |

\*PD, progressive disease; SD, stable disease; PR, partial response; CR, complete response



**Supplementary Table 3:** Overall survival of *EGFR*-mut patients treated with EGFR TKIs (n=59) classified according to IHC H-scores.

| <b>H-score</b>  | <b>OS / Q4</b> | <b>OS / Q1-Q3</b> | <b>p (Long-rank)</b> |
|-----------------|----------------|-------------------|----------------------|
| Non-mitotic pH3 | 18.8 months    | 34.9 months       | 0.413                |
| Mitotic pH3     | 20.8 months    | 35.4 months       | 0.126                |
| Ki67            | 21.9 months    | 36.7 months       | 0.071                |

**Supplementary Table 4:** Antibodies used in this study.

| Antibody | Vendor (IHC)                                      | Vendor (Western blotting)                   | Dilution                                 |
|----------|---------------------------------------------------|---------------------------------------------|------------------------------------------|
| EGFR     | --                                                | Cell Signaling Technology<br>(CST)-Cat#4267 | 1:1000                                   |
| pEGFR    | --                                                | CST-Cat#3777                                | 1:500                                    |
| AXL      | CST-Cat#8661                                      | CST-Cat#8661                                | 1:100 (IHC); 1:1000 (WB)                 |
| GAS6     | R&D Systems-Cat#<br>AF885                         | --                                          | 1:50                                     |
| MET      | Roche Diagnostics,<br>Clone SP44-Cat#790-<br>4430 | CST-Cat#8198                                | Ready to use (IHC);<br>1:1000 (WB)       |
| pMET     | --                                                | CST-Cat#3077                                | 1:500                                    |
| FGFR1    | --                                                | CST-Cat#9740                                | 1:1000                                   |
| FRS      | --                                                | R&D Systems-Cat#AF4069                      | 1:1000                                   |
| pFRS     | --                                                | CST-Cat#3861                                | 1:500                                    |
| ERK1/2   | --                                                | CST-Cat#9102                                | 1:1000                                   |
| pERK1/2  | --                                                | CST-Cat#9101                                | 1:500                                    |
| Akt      | --                                                | CST-Cat#9272                                | 1:1000                                   |
| pAkt     | --                                                | CST-Cat#9271                                | 1:500                                    |
| AURKB    | Abcam-Cat# ab2254*                                | CST-Cat#3094                                | 1:50 (ICC); 1:1000 (WB)                  |
| Ki67     | Roche Diagnostics,<br>Clone 30-9-Cat#790-<br>4286 | --                                          | Ready to use                             |
| H3       | --                                                | Abcam-Cat# ab1791                           | 1:1000                                   |
| pH3      | Abcam-Cat# ab5176                                 | Millipore-Cat#06-570*                       | 1:200 (IHC); 1:2000 (ICC);<br>1:250 (WB) |
| PARP     |                                                   | CST-Cat#9542                                | 1:1000                                   |
| Actin    | --                                                | Sigma Aldrich-Cat#A5441                     | 1:2000                                   |
| Tubulin  | --                                                | Sigma-Aldrich-Cat#T9026                     | 1:2000                                   |

\*Indicates the antibodies employed for ICC

**Supplementary Table 5:** Primers and probes used in this study

| Gene                               |       | Sequence                                                             |
|------------------------------------|-------|----------------------------------------------------------------------|
| <i>AURKB</i>                       | F     | 5' CATGAGCCGCTCCAATGTC 3'                                            |
|                                    | R     | 5' TGCTATTCTCCATCACCTTCTGG 3'                                        |
|                                    | Probe | 6FAM 5' AGCCCACAGCTGCC 3' MGB                                        |
| <i>ATM</i>                         | F     | 5' TGGTGTGAAATATCTCAGCAACAGT 3'                                      |
|                                    | R     | 5' CTTGTGAAGGTTTCAGATAGAGCCT 3'                                      |
|                                    | Probe | 6FAM 5' AGAATTGTTCTCTGTGTACTT 3' MGB                                 |
| <i>NFKBIA</i>                      | F     | 5' TCCTCAACTCCAGAACAACCTG 3'                                         |
|                                    | R     | 5' TTCTGGCTGGTTGGTGATCA 3'                                           |
|                                    | Probe | 6FAM 5' CAGCAGACTCCACTCC 3' MGB                                      |
| <i>53BP1</i>                       | F     | 5' GTCAGGTCATTGAGCAGTTACCTC 3'                                       |
|                                    | R     | 5' TCCTCCACAGCAGGAGCAG 3'                                            |
|                                    | Probe | 6FAM 5' GGACAAGCAGTGTCT 3' MGB                                       |
| <i>CHEK2</i>                       | F     | 5'TCCAAAGGCACGTTTTACGAC 3'                                           |
|                                    | R     | 5'TGTCTTCATCCTGAAGCCACG 3'                                           |
|                                    | Probe | 6FAM 5'AGAAGAAGCCTTAAGACACC 3' MGB                                   |
| <i>AXL</i> silencing               | shRNA | 5'CCGGCGTGGAGAACAGCGAGATTTACTCGAGTAAA<br>TCTCGCTGTTCTCCACGTTTTTTG 3' |
| <i>AURBK</i> silencing             | shRNA | 5'CCGGCCTGCGTCTCTACAACCTATTCTCGAGAAATA<br>GTTGTAGAGACGCAGGTTTTT 3'   |
| <i>AURBK</i> silencing<br>(CRISPR) | sgRNA | 5' ATTCTAGAGTATGCCCCCGCGG 3'                                         |
